# Supplementary material for: Aboveground Herbivory Shapes the Biomass Distribution and Flux of Soil Invertebrates
Source: PubMed Central journal article supplement (PMC2570614; doi:10.1371/journal.pone.0003573), 2008-10-31
Supplement: pone.0003573.s001.pdf [file pone.0003573.s001.pdf]

# Table S1 – CODE OF THE TROPHIC SPECIES (5 NUMBERS, 378 TAXA)

1<sup>st</sup> NUMBER (1 up to 9) PROVIDE INFORMATION ON THE **FEEDING STRATEGY**

**1 = Plant-feeder**

**2 = Fungivore**

**3 = Bacterivore**

**4 = Substrate ingestion**

**5 = Predator of nematodes**

**6 = Predator of arthropods**

**7 = General predator** (predator of nematodes and of arthropods, but no parasitizing life stage)

**8 = Omnivore** (generalist, predator, plant-feeder and/or fungivore, possibly parasite)

**9 = Parasite** (hosts are mites or nematodes; no passive dispersal of deutonymphs by phoresy)

2<sup>nd</sup> NUMBER (0 up to 5) PROVIDES INFORMATION ON THE **TAXOCENES** and BODY-WIDTH RANGE OF EUKARYOTES IN RELATION TO THE SOIL STRUCTURE: a. *microfauna*: decomposers, inhabit water films; b. *mesofauna*: predators and microbial grazers, inhabit air-filled pore spaces, use existing pore structures not altering pore structure; c. *macrofauna*: create their own spaces through burrowing activities, thus changing pore structure

## PROKARYOTES

MICROFLORA (MICROBES)

0 **Bacteria** (no taxonomical definition possible, all species lumped together, code “0000”)

## EUKARYOTES

### Class Nematoda

MICROFAUNA

1 **Nematoda** (169 taxa)

### Phylum Arthropoda

MESOFAUNA

2 *Acarina* (“Mites”, 146 taxa). Four suborders:

Oribatei (“K” strategists),

Prostigmata (*r*-strategists),

Mesostigmata, and

Astigmata

Generally, very little is known about the niches or ecological requirements of most soil mite species

3 *Insecta* (Subclass Apterygota)

Collembola – springtails, wingless hexapodous microarthropods

Protura – closely related to collembolans, minute, slender and wingless soil microarthropods

Diplura – japygids are predators on small arthropods, nematodes and enchytraeids or saprophagous feeders

*Myriapoda*

Pauropoda – blind, sense organs include peculiar 2-branched antennae, 3 long flagella

Symphyla – resemble tiny centipedes

### Class Oligochaeta

MESOFAUNA

4 Family Enchytraeidae (“potworms”, 8 genera), anatomically similar to tiny earthworms

MACROFAUNA

5 Family Lumbricidae (“Earthworms”, 9 genera)

|                   |       |                    |       |                                |       |
|-------------------|-------|--------------------|-------|--------------------------------|-------|
| Achromadora       | 21001 | Drilocephalobus    | 31061 | Paratylenchidae                | 11121 |
| Acrobeles         | 31002 | Ecphyadophora      | 11062 | Paratylenchus                  | 11122 |
| Acrobeloides      | 31003 | Ecumenicus         | 81063 | Pareudiplogaster               | 31123 |
| Acrobelophis      | 31004 | Epidorylaimus      | 81064 | Pellioiditis                   | 31124 |
| Acrolobus         | 31005 | Eucephalobus       | 31065 | Pelodera                       | 31125 |
| Aglenchus         | 11006 | Eudorylaimus       | 81066 | Plectidae                      | 31126 |
| Alaimidae         | 31007 | Eumonhystera       | 31067 | Plectus                        | 31127 |
| Alaimus           | 31008 | Euteratocephalus   | 31068 | Pratylenchidae                 | 11128 |
| Allodorylaimus    | 81009 | Fictor             | 31069 | Pratylenchus                   | 11129 |
| Amphidelus        | 31010 | Filenchus          | 11070 | Prionchulus                    | 51130 |
| Amplimerlinius    | 11011 | Geocenamus         | 11071 | Prismatolaimus                 | 31131 |
| Anaplectus        | 31012 | Geomonhystera      | 31072 | Pristionchus                   | 31132 |
| Anatonchus        | 51013 | Gracilacus         | 11073 | Prodesmodora                   | 31133 |
| Anguinidae        | 11014 | Helicotylenchus    | 11074 | Prodorylaimus                  | 81134 |
| Aphelenchidae     | 21015 | Hemicycliophora    | 11075 | Protorhabditis                 | 31135 |
| Aphelenchoides    | 21016 | Heterocephalobus   | 31076 | Pseudhalenchus                 | 21136 |
| Aphelenchoididae  | 21017 | Heterodera         | 11077 | Psilenchidae                   | 11137 |
| Aphelenchus       | 21018 | Heteroderidae      | 11078 | Psilenchus                     | 11138 |
| Aporcelaimellus   | 81019 | Heterorhabditis    | 91079 | Pungentus                      | 81139 |
| Aporcelaimidae    | 81020 | Hoplolaimidae      | 11080 | Qudsianematidae                | 81140 |
| Aporcelaimus      | 81021 | Labronema          | 81081 | Quinisulcius                   | 11141 |
| Basiria           | 11022 | Laimydorus         | 81082 | Rhabditidae                    | 31142 |
| Bastiana          | 31023 | Lelenchus          | 11083 | Rhabditis                      | 31143 |
| Bastianiidae      | 31024 | Leptonchidae       | 21084 | Rotylenchus                    | 11144 |
| Bitylenchus       | 11025 | Longidorella       | 11085 | Scutylenchus                   | 11145 |
| Boleodorus        | 11026 | Longidoridae       | 11086 | Seinura                        | 51146 |
| Bunonema          | 31027 | Longidorus         | 11087 | Steinernematidae               | 91147 |
| Bunonematidae     | 31028 | Macroposthonia     | 11088 | Teratocephalidae               | 31148 |
| Bursilla          | 31029 | Macrotrophurus     | 11089 | Teratocephalus                 | 31149 |
| Butlerius         | 31030 | Malenchus          | 11090 | Thonus                         | 51150 |
| Cephalenchus      | 31031 | Meloidogyne        | 11091 | Thornematidae                  | 81151 |
| Cephalobidae      | 31032 | Merlinius          | 11092 | Thornia                        | 81152 |
| Cephalobus        | 31033 | Mesodorylaimus     | 81093 | Torumanawa                     | 81153 |
| Cervidellus       | 31034 | Mesorhabditis      | 31094 | Trichodoridae                  | 11154 |
| Chiloplacus       | 31035 | Metateratocephalus | 31095 | Trichodorus                    | 11155 |
| Chromadoridae     | 31036 | Microdorylaimus    | 81096 | Tripyla                        | 51156 |
| Chronogaster      | 31037 | Microlaimidae      | 31097 | Tripylidae                     | 51157 |
| Clarkus           | 51038 | Microlaimus        | 31098 | Trischistoma                   | 51158 |
| Coarctadera       | 31039 | Monhystera         | 31099 | Trophurus                      | 11159 |
| Coomansus         | 51040 | Monhysteridae      | 31100 | Tylenchidae                    | 21160 |
| Coslenchus        | 11041 | Monhystrella       | 31101 | Tylencholaimellus              | 21161 |
| Criconematidae    | 11042 | Mononchidae        | 51102 | Tylencholaimus                 | 21162 |
| Cruznema          | 31043 | Mononchoides       | 51103 | Tylenchorhynchus               | 11163 |
| Cuticularia       | 31044 | Mononchus          | 51104 | Tylenchus                      | 21164 |
| Cylindrolaimus    | 31045 | Mydonomidae        | 81105 | Tylocephalus                   | 31165 |
| Dauerlarvae stage | 41046 | Mylonchulus        | 51106 | Tyloaimophorus                 | 21166 |
| Deladenus         | 91047 | Nagelus            | 11107 | Tylopharynx                    | 31167 |
| Diphtherophora    | 21048 | Neodiplogasteridae | 81108 | Wilsonema                      | 31168 |
| Diplogaster       | 81049 | Neopsilenchus      | 11109 | Xiphinema                      | 11169 |
| Diplogasteridae   | 81050 | Neothada           | 11110 |                                |       |
| Diploscapter      | 31051 | Nordiidae          | 81111 | <b>NEMATODA, 2nd</b>           |       |
| Discolaimus       | 51052 | Nothotylenchus     | 21112 | <b>NUMBER = 1, THE 3rd-5th</b> |       |
| Ditylenchus       | 21053 | Odontolaimus       | 31113 | <b>NUMBERS ARE</b>             |       |
| Dolichodoridae    | 11054 | Panagrobelus       | 31114 | <b>GENERA/FAMILIES</b>         |       |
| Dolichorhabditis  | 31055 | Panagrolaimidae    | 31115 | <b>FEEDING STRATEGIES:</b>     |       |
| Dolichorhynchus   | 11056 | Panagrolaimus      | 31116 |                                |       |
| Dorydorella       | 81057 | Paramphidelus      | 31117 |                                |       |
| Dorylaimoidea     | 81058 | Paraphanolaimus    | 31118 |                                |       |
| Dorylaimoides     | 81059 | Paratrichodorus    | 11119 |                                |       |
| Dorylaimus        | 81060 | Paratrophurus      | 11120 |                                |       |

1 = Plant-feeder, 2 = Fungivore,  
3 = Bacterivore, 4 = Substrate  
ingestion (only dauerlarvae), 5 =  
Predators of nematodes, 8 =  
Omnivore (1+2+5), 9 = Parasite

Achipteria 12001  
 Adamaeus 22002  
 Adoristes 22003  
 Alliphis 52004  
 Amblyseius 62005  
 Anystidae 72006  
 Arctoseius 72007  
 Asca 72008  
 Astegistes 22009  
 Astigmata 82010  
 Atropacarus 12011  
 Balaustium 92012  
 Banksinoma 22013  
 Bdella 62014  
 Bdellidae 62015  
 Belbidae 22016  
 Berniniella 22017  
 Blattisocius 62018  
 Brachychthoniidae 22019  
 Brachychthonius 22020  
 Camisia 12021  
 Cepheus 22022  
 Ceratoppia 22023  
 Ceratozetes 82024  
 Chamobates 22025  
 Cheiroseius (=Sejus) 72026  
 Cilliba 82027  
 Coccotydeus 12028  
 Cosmochthonius 22029  
 Cyrtolaelaps 72030  
 Damaeidae (sensu lato) 22031  
 Damaeobelba 22032  
 Damaeus 22033  
 Dendrolaelaps 72034  
 Dendroseius 72035  
 Diapterobates 22036  
 Dissorhina 22037  
 Diversipes 22038  
 Enochthonius 22039  
 Epicriopsis 22040  
 Ereyneidae 92041  
 Eriophyidae 12042  
 Erythraeidae 82043  
 Eulohmannia 22044  
 Eupelops 32045  
 Eupodes 82046  
 Eupodidae 82047  
 Euzetes 22048  
 Galumna 12049  
 Gamasodes 72050  
 Gamasolaelaps 72051  
 Geholaspis 62052  
 Hemileius 22053  
 Hermannia 22054  
 Histiostoma 32055  
 Holoparasitus 72056  
 Humeroabates 82057

Hypoaspis 72058  
 Hypochthonius 22059  
 Imparipes 22060  
 Isozercon 72061  
 Johnstonianidae 92062  
 Labidostomma 72063  
 Lasioseius 72064  
 Lauroppia 22065  
 Ledermuelleria 12066  
 Leioseius 72067  
 Liebstadia 22068  
 Linopodes 22069  
 Liochthonius 22070  
 Lysigamasus 72071  
 Macrocheles 72072  
 Macrochelidae 72073  
 Medioppia 22074  
 Mesostigmata (juven.) 82075  
 Metabelba 22076  
 Micropoppia 22077  
 Microtritia 12078  
 Microtydeus 22079  
 Minunthozetes 22080  
 Nanhermannia 22081  
 Nanorchestes 12082  
 Nenteria 82083  
 Neojordensia 72084  
 Nothrus 12085  
 Odontocephus 22086  
 Oppiella 22087  
 Oppiidae 22088  
 Oribatella 22089  
 Oribatida (juveniles) 82090  
 Oribatula 12091  
 Pachygnatidae 12092  
 Pachylaelaps 72093  
 Pachyseius 72094  
 Palaeacarus 22095  
 Parasitus 72096  
 Parazercon 72097  
 Penthaleus 12098  
 Penthalodidae 12099  
 Pergamasus 72100  
 Phauloppia 22101  
 Phthiracarus 12102  
 Phytoseiidae 62103  
 Platynothrus 12104  
 Prostigmata 92105  
 Protodinychus 82106  
 Prozercon 72107  
 Pseudoparasitus 92108  
 Punctoribates 22109  
 Pyemotes 92110  
 Pyemotidae 92111  
 Pygmephorus 22112  
 Quadroppia 22113  
 Ramusella 22114

Rhagidia 72115  
 Rhagidiidae 72116  
 Rhizoglyphus 12117  
 Rhodacarellus 72118  
 Rhodacaridae 72119  
 Rhodacarus 72120  
 Rhysotritia 22121  
 Scheloribates 82122  
 Schwiebea 22123  
 Scutacaridae 82124  
 Scutacarus 82125  
 Sellnickochthonius 22126  
 Siteroptes 22127  
 Spatiodamaeus 22128  
 Speleorchestes 22129  
 Steganacarus 12130  
 Stigmaeidae 82131  
 Suctobelbella 22132  
 Tarsonemidae 92133  
 Tarsonemus 82134  
 Tectocephus 22135  
 Trachytes 22136  
 Trichoribates 22137  
 Trombidiidae 92138  
 Tydeidae 12139  
 Tyrophagus 22140  
 Urobovella 72141  
 Uropoda 72142  
 Uroseius 72143  
 Veigaia 72144  
 Zercon 72145  
 Zercoseius 72146

**ACARINA (=MITES), THE 2<sup>nd</sup>  
 NUMBER = 2, 3<sup>rd</sup>-5<sup>th</sup> NUMBERS  
 ARE MOSTLY GENERA**

**THE DOMINANT FEEDING  
 STRATEGIES AS DERIVED  
 FROM FEEDING GUILDS:**

- 1 = Plant-feeder**  
(macrophytophages+panphytophages)
- 2 = Fungivore** (microphytophages)
- 3 = Bacterivore**
- 4 = Substrate ingestion** (does not occur in micro-arthropods)
- 5 = Predator of nematodes**
- 6 = Predator of arthropods**
- 7 = General predator** (5+6, no 9)
- 8 = Omnivore** (7+1+2, poss. +9)
- 9 = Parasite** (hosts are mites or nematodes; no passive dispersal of deutonymphs by phoresy)

## INSECTS AND OTHERS

|                 |       |
|-----------------|-------|
| Allacma         | 13001 |
| Anurida         | 23002 |
| Brachystomella  | 23003 |
| Ceratophysella  | 23004 |
| Dicyrtoma       | 13005 |
| DIPLURA         | 83006 |
| Entomobrya      | 13007 |
| Entomobryidae   | 13008 |
| Folsomia        | 23009 |
| Friesea         | 23010 |
| Heteromurus     | 23011 |
| Hypogastrura    | 23012 |
| Isotoma         | 23013 |
| Isotomiella     | 23014 |
| Isotomurus      | 23015 |
| Lepidocyrtus    | 23016 |
| Megalothorax    | 23017 |
| Mesaphorura     | 23018 |
| Neanura         | 23019 |
| Neelides        | 23020 |
| Onychiurus      | 23021 |
| Orchesella      | 23022 |
| Paratullbergia  | 23023 |
| Parisotoma      | 23024 |
| PAUROPODA       | 23025 |
| Proisotoma      | 23026 |
| Protaphorura    | 23027 |
| PROTURA         | 23028 |
| Pseudachorutes  | 23029 |
| Pseudisotoma    | 23030 |
| Pseudosinella   | 23031 |
| Sminthuridae    | 13032 |
| Sminthurides    | 13033 |
| Sminthurinus    | 13034 |
| Sminthurus      | 13035 |
| Sphaeridia      | 13036 |
| Stenaphorurella | 23037 |
| SYMPHYLA        | 13038 |
| Tomocerus       | 23039 |
| Vertagopus      | 23040 |
| Willemia        | 23041 |

THE SECOND NUMBER ("3") IS ONLY FOR COLLEMBOLA, DIPLURA, PAUROPODA, PROTURA AND SYMPHYLA

**FIRST NUMBER REFLECTS THE FEEDING-STRATEGY OF THESE ARTHROPODS: 1=plant-feeder, 2=fungivore, or 8=omnivore (1+2+7). OTHER FOUR NUMBERS PROVIDE TAXONOMIC INFORMATION**

## OLIGOCHAETA

|                          |       |
|--------------------------|-------|
| Juveniles (undiff/indet) | 44000 |
| Achaeta                  | 24001 |
| Buchholzia               | 44002 |
| Cognettia                | 24003 |
| Enchytraeus              | 34004 |
| Enchytronia              | 34005 |
| Fridericia               | 24006 |
| Hemienchytraeus          | 34007 |
| Hemifridericia           | 24008 |
| Henlea                   | 44009 |
| Marionina                | 44010 |
| Mesenchytraeus           | 34011 |
| Allobophora              | 45012 |
| Aporrectodea             | 45013 |
| Dendrobaena              | 45014 |
| Dendrodrilus             | 45015 |
| Eisenia                  | 45016 |
| Eiseniella               | 45017 |
| Lumbricus                | 45018 |
| Octolasion               | 45019 |
| Satchellius              | 45020 |

**OLIGOCHAETA (=WORMS)  
ENCHYTRAEIDAE  
( 2<sup>nd</sup> NUMBER = 4)  
AND LUMBRICIDAE  
(2<sup>nd</sup> NUMBER =5),  
THE 3<sup>rd</sup>-5<sup>th</sup> NUMBERS ARE  
GENERA OR LIFE-STAGES**

### FEEDING STRATEGIES:

**2 = Fungivore  
3 = Bacterivore  
4 = Substrate ingestion**

Please note: the feeding strategy **9 (= Parasite)** never occurs. These worms are not leeches.

**BACTERIAL CELLS HAVE NOT BEEN RECOGNIZED AT TAXONOMICAL LEVEL, AND ARE ENTERED IN THE DATASET WITH THE CODE 40000 (MORPHOSPECIES).**

## References used to establish trophic relationships

- Agrawal, A. A., Kobayashi, C. & Thaler, J. S. 1999 Influence of prey availability and induced host-plant resistance on omnivory by western flower thrips. *Ecology* 80:518-523.
- Axelsson, B., Lohm, U. & Persson, T. 1984 Enchytraeids, lumbricids and soil arthropods in a northern deciduous woodland – a quantitative study. *Holarctic Ecology* 7:91-103.
- Bardgett, R. D. & Chan, K. F. 1999 Experimental evidence that soil fauna enhance nutrient mineralization and plant nutrient uptake in montane grassland ecosystems. *Soil Biology and Biochemistry* 31:1007-1014.
- Bardgett, R. D. & Cook, R. 1998 Functional aspects of soil animal diversity in agricultural grasslands. *Applied Soil Ecology* 10:263-276.
- Bardgett, R. D., Cook, R., Yeates, G. W. & Denton, C. S. 1999 The influence of nematodes on below-ground processes in grassland ecosystems. *Plant and Soil* 212:23-33.
- Bardgett, R. D., Keiller, S., Cook, R. & Gilburn, A. S. 1998 Dynamic interactions between soil animals and microorganisms in upland grassland soils amended with sheep dung: a microcosm experiment. *Soil Biology and Biochemistry* 30:531-539

- Bardgett, R. D., Wardle, D. A. & Yeates, G. W. 1998 Linking above-ground and below-ground interactions: how plant responses to foliar herbivory influence soil organisms. *Soil Biology and Biochemistry* 30:1867-1878.
- Berg, M. P., Stoffer, M. & Van den Heuvel, H. H. 2002 Feeding guilds in Collembola based on digestive enzymes. *Pedobiologia* 48: 589-601.
- Chen, B. R. & Wise, D. H. 1997 Responses of forest-floor fungivores to experimental food enhancement. *Pedobiologia* 41:316-326.
- Cross, E. A. & Moser, J. C. 1975 A new dimorphic species of *Pyemotes* and a key to previously-described forms (Acarina: Tarsonemoidea). *Annals of the Entomological Society of America* 68:723-732.
- Cross, E. A., Moser, J. C. & Rack, G. 1981 Some new forms of *Pyemotes* (Acarina: Pyemotidae) from forest insects, with remarks on polymorphism. *International Journal of Acarology* 7:179-196.
- De Ruiter, P. C., Van Veen, J. A., Moore, J. C., Brussaard, L. & Hunt, H. W. 1993 Calculation of nitrogen mineralisation in soil food webs. *Plant and Soil* 157:263-273.
- Díaz, A., Okabe, K., Eckenrode, C. J., Villani, M. G. & O'Connor, B. M. 2000 Biology, ecology, and management of the bulb mites of the genus *Rhizoglyphus* (Acarina: Acaridae). *Experimental and Applied Acarology* 24:85-113.
- Dindal, D. L. 1990 *Soil biology guide*. John Wiley & Sons: New York.
- Enkegaard, A., Sardar, M. A. & Brødsgaard, H. F. 1997 The predatory mite *Hypoaspis miles*: biological and demographic characteristics on two prey species, the mushroom sciarid fly, *Lycoriella solani*, and the mould mite, *Tyrophagus putrescentiae*. *Entomologia Experimentalis et Applicata* 82:135-146.
- Gange, A. C. 1993 Translocation of mycorrhizal fungi by earthworms during early plant succession. *Soil Biology and Biochemistry* 25:1021-1026
- Gange, A. C. 2000a Species-specific responses of a root- and shoot-feeding insect to arbuscular mycorrhizal colonization of its host plant. *New Phytologist* 150:611-618
- Gange, A. C. 2000b Arbuscular mycorrhizal fungi, Collembola and plant growth. *Trends in Ecology and Evolution* 15:369-372.
- Gange, A. C. & Brown, V. K. 2002 Soil food web components affect plant community structure during early succession. *Ecological Research* 17:217-227.
- Hunt, H. W., Coleman, D. C., Ingham, E. R., Ingham, R. E., Elliot, E. T., Moore, J. C., Rose, S. L., Reid, C. P. P. & Morley C. R. 1987 The detrital food web in a shortgrass prairie. *Biology and Fertility of Soils* 3:57-68.
- Ingham, R. E., Trofymow, J. A., Ingham, E. R. & Coleman, D. C. 1985 Interactions of bacteria, fungi, and their nematode grazers: Effects on nutrient cycling and plant growth. *Ecological Monographs* 55:119-140.
- Janssen, A., Pallini, A., Venzon, M. & Sabelis, M. W. 1998 Behaviour and indirect interactions in food webs of plant-inhabiting arthropods. *Experimental and Applied Acarology* 22:497-521.
- Kay, F. R., Sobhy, H. M. & Whitford, W. G. 1999 Soil microarthropods as indicators of exposure to environmental stress in Chihuahuan desert Rangelands. *Biology and Fertility of Soils* 28:121-128.
- King, K. L., Hutchinson, K. J. & Greenslade, P. 1976 The effects of sheep numbers on associations of Collembola in sown pastures. *Journal of Applied Ecology* 13:731-739.
- Klironomos, J. N. & Kendrick, B. 1995a Relationships among microarthropods, fungi, and their environment. *Plant and Soil* 170:183-197.
- Klironomos, J. N. & Kendrick, B. 1995b. Stimulative effects of arthropods on endomycorrhizas of sugar maple in the presence of decaying litter. *Functional Ecology* 9:528-536
- Klironomos, J. N. & Kendrick, W. B. 1996 Palatability of

- microfungi to soil arthropods in relation to the functioning of arbuscular mycorrhizae. *Biology and Fertility of Soils* 21:43-52.
- Laakso, J. & Setälä, H. 1999 Population- and ecosystem-level effects of predation on microbial-feeding nematodes. *Oecologia* 120:279-286.
- Laakso, J., Setälä, H. & Palojarvi, A. 2000 Influence of decomposer food web structure and nitrogen availability on plant growth. *Plant and Soil* 225:153-165.
- Liiri, M., Setälä, H., Haimi, J., Pennanen, T. & Fritze, H. 2002a Relationship between soil microarthropod species diversity and plant growth does not change when the system is disturbed. *Oikos* 96:137-149.
- Liiri, M., Setälä, H., Haimi, J., Pennanen, T. & Fritze, H. 2002b Soil processes are not influenced by the functional complexity of soil decomposer food webs under disturbance. *Soil Biology and Biochemistry* 34:1009-1020.
- Marshall, V. G., Reeves, R. M. & Norton, R. A. 1987 Catalogue of the Oribatida (Acari) of continental United States and Canada. *Memoirs of the Entomological Society of Canada* 139:1-623.
- Moore, J. C., Walter, D. E. & Hunt, H. W. 1988 Arthropod regulation of micro- and mesobiota in below-ground detrital food web. *Annual Reviews of Entomology* 33:419-439.
- Mulder, Ch., Van Wijnen, H. J. & Van Wezel, A. P. 2005a Numerical abundance and biodiversity of below-ground taxocenes along a pH gradient across the Netherlands. *Journal of Biogeography* 32:1775-1790.
- Mulder, Ch., Cohen, J. E., Setälä, H., Bloem, J. & Breure, A. M. 2005b Bacterial traits, organism mass, and numerical abundance in the detrital soil food web of Dutch agricultural grasslands. *Ecology Letters* 8:80-90 (Supplementary Online Material free available at <http://www.blackwellpublishing.com/products/journals/suppmat/ELE/ELE704/ELE704sm.htm>).
- Mulder, Ch., Dijkstra, J.B. & Setälä, H. 2005c Nonparasitic Nematoda provide evidence for a linear response of functionally important soil biota to increasing livestock density. *Naturwissenschaften* 92:314-318.
- Mulder, Ch., Schouten, A. J., Hund-Rinke, K. & Breure, A. M. 2005d The use of nematodes in ecological soil classification and assessment concepts. *Ecotoxicology and Environmental Safety (Environmental Research Section B)* 62: 278-289.
- Okada, H., Tsukiboshi, T. & Kadota, I. 2002 Mycetophagy in *Filenchus misellus* (Andrássy, 1958) Lownsbey & Lownsbey, 1985 (Nematoda: Tylenchidae) with notes on its morphology. *Nematology* 4:795-801.
- Patt, J. M., Wainright, S. C., Hamilton, G. C., Whittinghill, D., Bosley, K., Dietrick, J. & Lashomb, J. H. 2003 Assimilation of carbon and nitrogen from pollen and nectar by a predaceous larva and its effects on growth and development. *Ecological Entomology* 28:717-728.
- Perez-Moreno, J. & Read, D. J. 2001 Nutrient transfer from soil nematodes to plants: a direct pathway provided by the mycorrhizal mycelial network. *Plant, Cell and Environment* 24:1219-1226.
- Petersen, H. 1981 The respiratory metabolism of Collembola species from a Danish beech wood. *Oikos* 37:273-286.
- Petersen, H. 1995a Temporal and spatial dynamics of soil Collembola during secondary succession in Danish heathland. *Acta Zoologica Fennica* 196:190-194.
- Petersen, H. 1995b Energy flow and trophic relations in soil communities: state of knowledge two decades after the International biological Programme. In: Edwards, C. A., Abe, T. & Striganova, B. R. (eds.) *Structure and Function of Soil Communities*. Kyoto University Press, p. 111-130.
- Petersen, H. 2000 Collembola populations in an organic crop rotation: population dynamics and metabolism

- after conversion from clover-grass ley to spring barley. *Pedobiologia* 44:502-515.
- Petersen, H. 2002 Effects of non-inverting deep tillage vs. conventional ploughing on collembolan populations in an organic wheat field. *European Journal of Soil Biology* 38:177-180.
- Petersen, H. & Gjelstrup, P. 1998 Effects of the insecticide dimethoate on the behaviour of *Folsomia fimetaria* (L.) (Collembola: Isotomidae). *Applied Soil Ecology* 9:389-392.
- Petersen, H. & Luxton, M. 1982 A comparative analysis of soil fauna populations and their role in decomposition process. *Oikos* 39:288-388.
- Petersen, H., Jucevica, E. & Gjelstrup, P. 2004 Long-term changes in collembolan communities in grazed and non-grazed abandoned arable fields in Denmark. *Pedobiologia* 48:559-573.
- Phillipson, J., Abel, R., Steel, J. & Woodell, S. R. J. 1977 Nematode numbers, biomass and respiratory metabolism in a beech woodland – Wytham Woods, Oxford. *Oecologia* 27:141-155.
- Radwan, J. & Bogacz, I. 2000 Comparison of life-history traits of the two male morphs of the bulb mite, *Rhizoglyphus robini*. *Experimental and Applied Acarology* 24:115-121.
- Rantalainen, M.-L., Fritze, H., Haimi, J., Kiikkilä, O., Pennanen, T. & Setälä, H. 2004 Do enchytraeid worms and habitat corridors facilitate the colonization of habitat patches by soil microbes? *Biology and Fertility of Soils* 39:200-208.
- Scheu, S. & Falca, M. 2000 The soil food web of two beech forests (*Fagus sylvatica*) of contrasting humus type: stable isotope analysis of a macro- and a mesofauna-dominated community. *Oecologia*, 123:285-296.
- Scheu, S. & Folger, M. 2004 Single and mixed diets in Collembola: effects on reproduction and stable isotope fractionation. *Functional Ecology* 18:94-102.
- Scheu, S. & Setälä, H. 2002 Multitrophic interactions in decomposer food-webs. In: Tscharnkte, T. & Hawkins B. A. (eds.) *Multitrophic Level Interactions*. Cambridge University Press: Cambridge, p. 223-264.
- Scheu, S. & Simmerling, F. 2004 Growth and reproduction of fungal feeding Collembola as affected by fungal species, melanin and mixed diets. *Oecologia* 139:347-353.
- Scheu, S., Theenhaus, A. & Jones, T. H. 1999 Links between the detritivore and the herbivore system: effects of earthworms and Collembola on plant growth and aphid development. *Oecologia* 119:541-551.
- Schönholzer, F., Hahn, D. & Zeyer, J. 1999 Origins and fate of fungi and bacteria in the gut of *Lumbricus terrestris* L. studied by image analysis. *FEMS Microbiology Ecology* 28:235-248.
- Setälä, H. 1995 Growth of birch and pine seedlings in relation to grazing by soil fauna on ectomycorrhizal fungi. *Ecology* 76:1844-1851.
- Setälä, H. 2002 Sensitivity of ecosystem functioning to changes in trophic structure, functional group composition and species diversity in belowground food webs. *Ecological Research* 17:207-215.
- Setälä, H., Tyynismaa, M., Martikainen, E. & Huhta, V. 1991 Mineralization of C, N and P in relation to decomposer community structure in coniferous forest soil. *Pedobiologia* 35:285-296.
- Setälä, H., Laakso, J., Mikola, J. & Huhta, V. 1998 Functional diversity of decomposer organisms in relation to primary production. *Applied Soil Ecology* 9:25-31.
- Siemann, E., Tilman, D. & Haarstad, J. 1999 Abundance, diversity and body size: patterns from a grassland arthropod community. *Journal of Animal Ecology* 68:824-835
- Siepel, H. 1994 Life-history tactics of soil microarthropods. *Biology and Fertility of Soils* 18:263-278.
- Siepel, H. & De Ruiter-Dijkman, E. M. 1993 Feeding guilds of oribatid mites based on carbohydrase enzyme activities. *Soil*

- Biology and Biochemistry* 25:1491-1497.
- Siepel, H. & Maaskamp, F. 1994 Mites of different feeding guilds affect decomposition of organic matter. *Soil Biology and Biochemistry* 26:1389-1394.
- Small, R. W. 1987 A review of the prey of predatory soil nematodes. *Pedobiologia* 30:179-206.
- Van Straalen, N. M. 1982 Demographic analysis of arthropod populations using a continuous stage-variable. *Journal of Animal Ecology* 51:769-783.
- Van Straalen, N. M. 1985 Comparative demography of forest floor Collembola populations. *Oikos* 45:253-265.
- Van Straalen, N. M. 1987 Turnover of accumulating substances in populations with weight-structure. *Ecological Modelling* 36:195-209.
- Van Straalen, N. M. 1989 Production and biomass turnover in two populations of forest floor Collembola. *Netherlands Journal of Zoology* 39:156-168.
- Van Straalen, N. M. & Verhoef, H. A. 1997 The development of a bioindicator system for soil acidity based on arthropod pH preferences. *Journal of Applied Ecology* 34:217-232.
- Vegter, J. J. 1983 Food and habitat specialization in coexisting springtails (Collembola, Entomobryidae). *Pedobiologia* 25:253-262.
- Vegter, J. J. 1987 Phenology and seasonal resource partitioning in forest floor Collembola. *Oikos* 48:175-185.
- Vegter, J. J., De Bie, P. & Dop, H. 1988a Distributional ecology of forest floor Collembola (Entomobryidae) in the Netherlands. *Pedobiologia* 31:65-73.
- Vegter, J. J., Joosse, E. N. G. & Ernsting, G. 1988b Community structure, distribution and population dynamics of Entomobryidae (Collembola). *Journal of Animal Ecology* 57:971-981.
- Verhoef, H. A. 1995 Animal ecophysiology: cornerstone for soil ecosystem studies as exemplified by studies on arthropods. *Acta Zoologica Fennica* 196:176-182.
- Vreeken Buijs, M. J., Geurs, M., De Ruiter, P. C. & Brussaard, L. 1997 The effects of bacterivorous mites and amoebae on mineralization in a detrital based below-ground food web; microcosm experiment and simulation of interactions. *Pedobiologia* 41:481-493.
- Wardle, D. A., Yeates, G. W., Watson, R. N. & Nicholson, K. S. 1995 development of the decomposer food-web, trophic relationships, and ecosystem properties during a three year primary succession in sawdust. *Oikos* 73:155-166.
- Wardle, D. A., Barker, G. M., Yeates, G. W., Bonner, K. I. & Ghani, A. 2001 Introduced browsing mammals in New Zealand natural forests: Aboveground and belowground consequences. *Ecological Monographs* 71:587-614.
- Wolters, V. 1985 Resource allocation in *Tomocerus flavescens* (Insecta, Collembola): a study with C-14-labelled food. *Oecologia* 65:229-235.
- Wolters, V. 1998 Long-term dynamics of a collembolan community. *Applied Soil Ecology* 9:221-227.
- Yeates, G. W. 1979 Soil nematodes in terrestrial ecosystems. *Journal of Nematology* 11:213-229.
- Yeates, G. W. 2003 Nematodes as soil indicators: functional and biodiversity aspects. *Biology and Fertility of Soils* 37:199-210.
- Yeates, G. W., Bongers, T., De Goede, R. G. M., Freckman, D. W. & Georgieva, S. S. 1993 Feeding habits in soil nematode families and genera – an outline for soil ecologists. *Journal of Nematology* 25:315-331.
- Yeates, G. W., Saggar, S., Denton, C. S. & Mercer, C. F. 1998 Impact of clover cyst nematode (*Heterodera trifolii*) infection on soil microbial activity in the rhizosphere of white clover (*Trifolium repens*): a pulse labelling experiment. *Nematologica* 44:81-90.
